# Supplementary figures and images for: Real-time tracking, retrieval and gene expression analysis of migrating human T cells
Source: Royal Society of Chemistry journal article supplement (doi:10.1039/c4lc01038h), 2014-12-05

## Figure S3

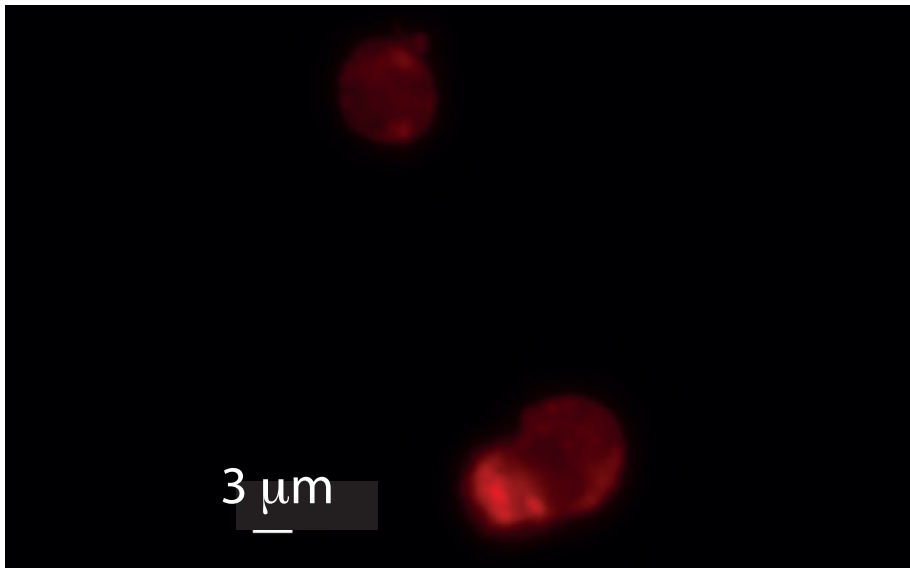

Supplement: c4lc01038h4.pdf [file c4lc01038h4.pdf]
